# Supplementary material for: Adverse Reactions in Relapsed/Refractory B-Cell Lymphoma Administered with Chimeric Antigen Receptor T Cell Alone or in Combination with Autologous Stem Cell Transplantation
Source: Cancers (Basel). 2024 Apr 28;16(9):1722. doi: 10.3390/cancers16091722 (PMC11083715; doi:10.3390/cancers16091722)
Supplement: Supplementary file 1 [file cancers-16-01722-s001.zip › Supplement Table S1. Detailed Information of Enrolled Patients.xlsx]

## Sheet: Sheet1
Patient	Treatment type	Pathological type	Sex	Age	CRS	CRES	Targets	CNSL
1	ASCT+CAR-T	Burkitt Lymphoma	Male	32	1	0	CD19/22	0
2	ASCT+CAR-T	Burkitt Lymphoma	Male	30	2	2	CD19/22	0
3	ASCT+CAR-T	Burkitt Lymphoma	Female	16	3	1	CD19/22	0
4	ASCT+CAR-T	Burkitt Lymphoma	Female	54	3	0	CD19/22	0
5	ASCT+CAR-T	Burkitt Lymphoma	Male	62	2	0	CD19/22	0
6	ASCT+CAR-T	Burkitt Lymphoma	Female	51	2	0	CD19/22	0
7	ASCT+CAR-T	Burkitt Lymphoma	Male	70	1	0	CD19/20	0
8	ASCT+CAR-T	Burkitt Lymphoma	Male	37	1	0	CD19/20	0
9	ASCT+CAR-T	Burkitt Lymphoma	Female	31	2	0	CD19/20	0
10	ASCT+CAR-T	HGBL	Male	51	3	1	CD19/22	0
11	ASCT+CAR-T	HL	Female	18	1	0	CD30	0
12	ASCT+CAR-T	HL	Male	25	1	0	CD30	0
13	ASCT+CAR-T	FL	Male	40	1	0	CD19/22	0
14	ASCT+CAR-T	FL	Male	57	2	0	CD19	0
15	ASCT+CAR-T	DLBCL	Female	56	1	0	CD19/22	0
16	ASCT+CAR-T	DLBCL	Male	33	1	0	CD19/22	0
17	ASCT+CAR-T	DLBCL	Male	55	0	0	CD19/22	1
18	ASCT+CAR-T	DLBCL	Female	47	1	2	CD19/22	0
19	ASCT+CAR-T	DLBCL	Male	61	1	0	CD19/20	0
20	ASCT+CAR-T	DLBCL	Male	34	1	0	CD19/20	0
21	ASCT+CAR-T	DLBCL	Male	41	1	0	CD19/20	0
22	ASCT+CAR-T	DLBCL	Female	31	1	0	CD19/20	0
23	ASCT+CAR-T	DLBCL	Female	66	1	0	CD19/22	0
24	ASCT+CAR-T	DLBCL	Female	50	1	0	CD19/22	0
25	ASCT+CAR-T	DLBCL	Female	48	1	0	CD19/22	0
26	ASCT+CAR-T	DLBCL	Male	53	1	0	CD19/22	0
27	ASCT+CAR-T	DLBCL	Female	42	1	0	CD19/22	0
28	ASCT+CAR-T	DLBCL	Female	32	1	0	CD19/22	0
29	ASCT+CAR-T	DLBCL	Male	47	1	0	CD19/22	1
30	ASCT+CAR-T	DLBCL	Male	61	1	0	CD19/22	0
31	ASCT+CAR-T	DLBCL	Female	39	1	0	CD19/22	1
32	ASCT+CAR-T	DLBCL	Male	51	2	0	CD19	0
33	ASCT+CAR-T	DLBCL	Female	25	2	0	CD19	0
34	ASCT+CAR-T	DLBCL	Female	35	2	0	CD19/20	0
35	ASCT+CAR-T	DLBCL	Female	51	2	0	CD19/22	0
36	ASCT+CAR-T	DLBCL	Female	57	2	0	CD19/22	0
37	ASCT+CAR-T	DLBCL	Female	54	2	0	CD19/22	0
38	ASCT+CAR-T	DLBCL	Female	30	2	2	CD19/22	0
39	ASCT+CAR-T	DLBCL	Male	63	2	0	CD19/22	0
40	ASCT+CAR-T	DLBCL	Female	62	2	0	CD19	0
41	ASCT+CAR-T	DLBCL	Male	66	2	0	CD19	0
42	ASCT+CAR-T	DLBCL	Female	22	3	0	CD19	0
43	ASCT+CAR-T	DLBCL	Female	53	0	0	CD19/22	0
44	ASCT+CAR-T	DLBCL	Female	42	2	0	CD19/20/22	0
45	ASCT+CAR-T	DLBCL	Female	43	1	0	CD19/22	0
46	ASCT+CAR-T	DLBCL	Male	44	1	0	CD19/22	0
47	ASCT+CAR-T	DLBCL	Male	34	1	0	CD19/22	0
48	ASCT+CAR-T	DLBCL	Female	52	1	0	CD19/22	1
49	ASCT+CAR-T	DLBCL	Female	42	2	0	CD19/22	0
50	ASCT+CAR-T	DLBCL	Female	60	1	0	CD19/22	0
51	ASCT+CAR-T	DLBCL	Female	57	1	0	CD19/22	0
52	ASCT+CAR-T	DLBCL	Female	51	2	0	CD19/22	0
53	ASCT+CAR-T	DLBCL	Male	44	1	0	CD19/22	0
54	ASCT+CAR-T	DLBCL	Female	48	2	0	CD22	0
55	ASCT+CAR-T	DLBCL	Female	33	2	0	CD19/22	0
56	ASCT+CAR-T	DLBCL	Male	42	2	0	CD19	1
57	ASCT+CAR-T	DLBCL	Male	42	2	0	CD19/22	0
58	ASCT+CAR-T	DLBCL	Male	33	1	0	CD19/20/22	0
59	ASCT+CAR-T	DLBCL	Male	50	3	0	CD19/22	0
60	ASCT+CAR-T	DLBCL	Female	44	0	0	CD19/22	0
61	ASCT+CAR-T	DLBCL	Female	30	2	3	CD19/22	0
62	ASCT+CAR-T	DLBCL	Male	23	1	0	CD19/22	1
63	ASCT+CAR-T	DLBCL	Male	61	1	0	CD19/20	1
64	ASCT+CAR-T	DLBCL	Male	21	3	1	CD19/22	1
65	ASCT+CAR-T	DLBCL	Male	27	1	0	CD19/22	1
66	ASCT+CAR-T	DLBCL	Male	49	2	0	CD19/22	1
67	ASCT+CAR-T	DLBCL	Male	33	3	0	CD19/22	0
68	ASCT+CAR-T	DLBCL	Female	36	1	0	CD19/20	0
69	ASCT+CAR-T	DLBCL	Male	43	2	0	CD20/22	0
70	ASCT+CAR-T	DLBCL	Male	61	2	2	CD19	1
71	ASCT+CAR-T	DLBCL	Male	39	3	1	CD19/22	0
72	ASCT+CAR-T	DLBCL	Male	36	1	0	CD19	0
73	ASCT+CAR-T	DLBCL	Male	45	1	0	CD19/22	0
74	ASCT+CAR-T	DLBCL	Female	34	1	0	CD19/20	0
75	ASCT+CAR-T	DLBCL	Female	62	1	0	CD22	0
76	ASCT+CAR-T	DLBCL	Male	52	3	0	CD22	0
77	ASCT+CAR-T	DLBCL	Male	52	1	0	CD19/20/22	0
78	ASCT+CAR-T	DLBCL	Male	52	3	0	CD19	0
79	ASCT+CAR-T	DLBCL	Male	43	1	0	CD19	0
80	ASCT+CAR-T	DLBCL	Male	51	1	0	CD19	0
81	ASCT+CAR-T	DLBCL	Male	56	2	2	CD19	0
82	ASCT+CAR-T	DLBCL	Male	60	2	0	CD19	0
83	ASCT+CAR-T	DLBCL	Female	25	2	0	CD19	0
84	ASCT+CAR-T	DLBCL	Male	34	2	0	CD19	0
85	ASCT+CAR-T	DLBCL	Male	27	1	0	CD19/22	0
86	ASCT+CAR-T	DLBCL	Female	62	1	0	CD19/22	0
87	ASCT+CAR-T	DLBCL	Female	41	3	0	CD19	0
88	ASCT+CAR-T	DLBCL	Male	66	3	0	CD19	0
89	ASCT+CAR-T	DLBCL	Male	34	3	0	CD19	0
90	ASCT+CAR-T	DLBCL	Male	36	2	0	CD19/22	0
91	ASCT+CAR-T	DLBCL	Female	52	1	0	CD19/22	0
92	ASCT+CAR-T	DLBCL	Male	40	2	0	CD19/22	1
93	ASCT+CAR-T	DLBCL	Male	30	2	0	CD19/20/22	0
94	ASCT+CAR-T	DLBCL	Female	56	2	3	CD19	0
95	ASCT+CAR-T	DLBCL	Female	56	2	3	CD19	0
96	ASCT+CAR-T	DLBCL	Male	45	1	0	CD19/20	0
97	ASCT+CAR-T	DLBCL	Female	63	1	0	CD19	0
98	ASCT+CAR-T	DLBCL	Male	53	3	1	CD19	0
99	ASCT+CAR-T	DLBCL	Male	57	1	0	CD19	0
100	ASCT+CAR-T	DLBCL	Male	32	1	0	CD19/22	0
101	ASCT+CAR-T	DLBCL	Male	52	2	0	CD19	1
102	ASCT+CAR-T	DLBCL	Male	42	2	0	CD19/22	0
103	ASCT+CAR-T	DLBCL	Male	52	2	1	CD19	1
104	ASCT+CAR-T	DLBCL	Male	67	2	2	CD19	1
105	ASCT+CAR-T	DLBCL	Male	44	1	0	CD19/22	0
106	ASCT+CAR-T	DLBCL	Male	48	1	0	CD19/20/22	0
107	ASCT+CAR-T	DLBCL	Male	51	3	0	CD19/22	0
108	ASCT+CAR-T	DLBCL	Male	43	3	0	CD19/22	0
109	ASCT+CAR-T	DLBCL	Female	31	1	0	CD19/22	0
110	ASCT+CAR-T	DLBCL	Female	34	3	0	CD19/20	0
111	ASCT+CAR-T	DLBCL	Female	33	1	0	CD19/22	1
112	ASCT+CAR-T	DLBCL	Female	48	2	0	CD19	0
113	ASCT+CAR-T	DLBCL	Male	30	1	0	CD19/22	0
114	ASCT+CAR-T	DLBCL	Male	60	2	0	CD19/22	0
115	ASCT+CAR-T	DLBCL	Female	41	1	0	CD19/22	0
116	ASCT+CAR-T	DLBCL	Female	50	2	0	CD19/20/22	0
117	ASCT+CAR-T	DLBCL	Male	38	1	1	CD19/22	0
118	ASCT+CAR-T	DLBCL	Male	33	1	0	CD19/22	0
119	ASCT+CAR-T	DLBCL	Female	50	2	3	CD19/22	0
120	ASCT+CAR-T	DLBCL	Female	48	0	0	CD19/22	0
121	ASCT+CAR-T	DLBCL	Male	51	1	0	CD19/22	0
122	ASCT+CAR-T	DLBCL	Male	58	2	0	CD19/22	0
123	ASCT+CAR-T	DLBCL	Male	50	1	0	CD20/22	0
124	ASCT+CAR-T	DLBCL	Male	36	2	0	CD19/22	1
125	ASCT+CAR-T	DLBCL	Male	53	1	0	CD19/22	0
126	ASCT+CAR-T	DLBCL	Male	22	1	0	CD19/22	0
127	ASCT+CAR-T	DLBCL	Female	60	2	3	CD19/22	0
128	ASCT+CAR-T	DLBCL	Female	58	2	0	CD19/22	0
129	ASCT+CAR-T	DLBCL	Male	37	1	0	CD19/22	0
130	ASCT+CAR-T	DLBCL	Male	41	2	0	CD19/22	0
131	ASCT+CAR-T	DLBCL	Female	41	1	0	CD19/22	0
132	ASCT+CAR-T	MCL	Male	44	2	0	CD19/22	0
133	ASCT+CAR-T	MCL	Male	45	0	0	CD19/22	0
134	ASCT+CAR-T	MCL	Male	44	3	0	CD19/20	0
135	ASCT+CAR-T	DLBCL	Male	61	2	2	CD19	1
136	ASCT+CAR-T	DLBCL	Female	52	1	0	CD19	0
137	ASCT+CAR-T	DLBCL	Female	47	1	0	CD19/22	0
138	ASCT+CAR-T	DLBCL	Male	39	1	0	CD19/22	0
139	ASCT+CAR-T	DLBCL	Male	52	2	2	CD19	0
140	ASCT+CAR-T	DLBCL	Male	26	2	0	CD19/22	1
141	ASCT+CAR-T	DLBCL	Male	63	3	1	CD19/22	1
142	ASCT+CAR-T	DLBCL	Male	55	0	0	CD19/20/22	0
143	ASCT+CAR-T	DLBCL	Female	24	4	3	CD19/22	1
144	ASCT+CAR-T	DLBCL	Male	29	3	0	CD19/22	1
145	ASCT+CAR-T	DLBCL	Male	42	1	0	CD19/22	1
146	CAR-T	B-LBL	Male	33	0	1	CD19/22	0
147	CAR-T	Burkitt Lymphoma	Male	57	0	0	CD19	0
148	CAR-T	Burkitt Lymphoma	Female	46	0	0	CD19/22	0
149	CAR-T	HGBL	Male	56	1	0	CD19/22	0
150	CAR-T	HGBL	Male	63	1	0	CD19	0
151	CAR-T	HGBL	Male	47	0	0	CD19/22	0
152	CAR-T	HL	Female	20	2	0	CD30	0
153	CAR-T	HL	Male	20	1	0	CD30	0
154	CAR-T	HL	Male	36	1	0	CD30	0
155	CAR-T	HL	Male	33	1	0	CD30	0
156	CAR-T	HL	Female	25	1	0	CD30	0
157	CAR-T	HL	Female	27	1	0	CD30	0
158	CAR-T	HL	Female	52	1	0	CD30	0
159	CAR-T	FL	Male	39	0	0	CD19/22	0
160	CAR-T	FL	Male	41	1	0	CD19/22	0
161	CAR-T	FL	Female	60	2	3	CD19	0
162	CAR-T	DLBCL	Female	51	1	0	CD19/20/22	0
163	CAR-T	DLBCL	Female	54	0	0	CD19/22	0
164	CAR-T	DLBCL	Male	59	1	0	CD19	0
165	CAR-T	DLBCL	Female	31	1	0	CD19/22	0
166	CAR-T	DLBCL	Male	30	1	0	CD19/22	0
167	CAR-T	DLBCL	Male	61	1	0	CD19/20	0
168	CAR-T	DLBCL	Male	41	1	0	CD19/22	0
169	CAR-T	DLBCL	Female	54	1	0	CD19/22	0
170	CAR-T	DLBCL	Male	41	1	0	CD19/20/22	0
171	CAR-T	DLBCL	Female	43	1	0	CD19/22	0
172	CAR-T	DLBCL	Male	38	1	0	CD19/22	0
173	CAR-T	DLBCL	Male	47	1	0	CD19	0
174	CAR-T	DLBCL	Male	58	1	0	CD19	0
175	CAR-T	DLBCL	Female	64	3	0	CD19/20	0
176	CAR-T	DLBCL	Male	53	3	0	CD19/20	0
177	CAR-T	DLBCL	Female	56	0	0	CD19/22	0
178	CAR-T	DLBCL	Female	53	0	0	CD19/20	0
179	CAR-T	DLBCL	Male	58	1	0	CD19/22	0
180	CAR-T	DLBCL	Male	58	2	0	CD19	0
181	CAR-T	DLBCL	Male	14	0	0	CD19/20	0
182	CAR-T	DLBCL	Female	46	3	0	CD19	0
183	CAR-T	DLBCL	Female	54	2	0	CD19/22	0
184	CAR-T	DLBCL	Female	57	2	0	CD19/20	0
185	CAR-T	DLBCL	Male	48	1	0	CD19/22	0
186	CAR-T	DLBCL	Male	64	2	0	CD19/22	0
187	CAR-T	DLBCL	Male	43	2	0	CD19/20	0
188	CAR-T	DLBCL	Male	56	1	0	CD19/22	0
189	CAR-T	DLBCL	Female	64	1	0	CD19/20	0
190	CAR-T	DLBCL	Male	71	1	1	CD19	0
191	CAR-T	DLBCL	Male	68	0	0	CD19/22	0
192	CAR-T	DLBCL	Male	52	2	2	CD19/22	0
193	CAR-T	DLBCL	Male	33	4	0	CD19/22	0
194	CAR-T	DLBCL	Female	41	1	0	CD19/22	0
195	CAR-T	DLBCL	Male	44	2	0	CD19/22	0
196	CAR-T	DLBCL	Female	31	1	0	CD19/20/22	0
197	CAR-T	DLBCL	Male	33	1	0	CD19/22	0
198	CAR-T	DLBCL	Male	48	1	0	CD19/20	0
199	CAR-T	DLBCL	Male	47	2	0	CD19/20	0
200	CAR-T	DLBCL	Male	53	1	0	CD19/22	0
201	CAR-T	DLBCL	Male	58	1	0	CD19	0
202	CAR-T	DLBCL	Female	27	2	0	CD19/22	0
203	CAR-T	DLBCL	Male	51	0	0	CD19/20/22	0
204	CAR-T	DLBCL	Male	66	2	0	CD19/22	0
205	CAR-T	DLBCL	Male	59	1	0	CD19	0
206	CAR-T	DLBCL	Male	44	0	0	CD19/22	0
207	CAR-T	DLBCL	Female	46	0	0	CD19	0
208	CAR-T	DLBCL	Male	64	1	0	CD19/22	0
209	CAR-T	DLBCL	Male	43	1	0	CD19	0
210	CAR-T	DLBCL	Male	74	1	0	CD19	0
211	CAR-T	DLBCL	Male	63	3	0	CD19/20	0
212	CAR-T	DLBCL	Male	38	1	0	CD19/22	0
213	CAR-T	DLBCL	Female	51	2	0	CD19/22	0
214	CAR-T	DLBCL	Female	42	0	0	CD19/22	0
215	CAR-T	DLBCL	Female	55	1	0	CD19	0
216	CAR-T	DLBCL	Female	47	1	0	CD19	0
217	CAR-T	DLBCL	Female	55	2	0	CD20/22	0
218	CAR-T	DLBCL	Female	57	0	1	CD19	0
219	CAR-T	DLBCL	Female	60	1	0	CD19	0
220	CAR-T	DLBCL	Male	59	1	3	CD19/22	0
221	CAR-T	DLBCL	Male	56	3	0	CD19	0
222	CAR-T	DLBCL	Female	34	1	0	CD19/20	0
223	CAR-T	DLBCL	Female	46	0	0	CD19/22	0
224	CAR-T	DLBCL	Female	27	1	0	CD19/22	0
225	CAR-T	DLBCL	Female	46	1	0	CD19/20/22	0
226	CAR-T	DLBCL	Male	68	0	0	CD19/22	0
227	CAR-T	DLBCL	Male	61	3	1	CD19/20	0
228	CAR-T	DLBCL	Female	75	1	0	CD19	0
229	CAR-T	DLBCL	Female	37	1	0	CD20/22	0
230	CAR-T	DLBCL	Female	55	0	0	CD19/22	0
231	CAR-T	DLBCL	Male	70	0	0	CD19	0
232	CAR-T	DLBCL	Male	31	1	0	CD19	0
233	CAR-T	DLBCL	Female	53	1	0	CD19/22	0
234	CAR-T	DLBCL	Male	69	3	0	CD19/22	0
235	CAR-T	DLBCL	Male	69	2	0	CD19	0
236	CAR-T	DLBCL	Male	46	0	0	CD19/22	0
237	CAR-T	DLBCL	Female	56	0	0	CD19	0
238	CAR-T	DLBCL	Male	28	1	0	CD19/22	0
239	CAR-T	DLBCL	Male	60	0	0	CD19/22	0
240	CAR-T	DLBCL	Male	42	3	0	CD19/20	0
241	CAR-T	DLBCL	Female	53	1	0	CD19/22	0
242	CAR-T	DLBCL	Male	58	1	0	CD19/22	0
243	CAR-T	DLBCL	Male	63	1	0	CD19	0
244	CAR-T	DLBCL	Female	59	1	0	CD19/22	0
245	CAR-T	DLBCL	Male	62	0	0	CD19/22	0
246	CAR-T	DLBCL	Male	35	0	0	CD19/22	0
247	CAR-T	DLBCL	Male	34	1	0	CD19/22	0
248	CAR-T	DLBCL	Male	36	3	0	CD19/22	0
249	CAR-T	DLBCL	Female	48	0	0	CD19/20	0
250	CAR-T	DLBCL	Male	56	1	0	CD19/20	0
251	CAR-T	DLBCL	Male	59	2	0	CD19/22	0
252	CAR-T	DLBCL	Female	44	1	0	CD19	0
253	CAR-T	DLBCL	Male	59	3	0	CD19/20	0
254	CAR-T	DLBCL	Female	52	1	0	CD19	0
255	CAR-T	DLBCL	Male	47	1	0	CD19	0
256	CAR-T	DLBCL	Male	56	1	0	CD19	0
257	CAR-T	DLBCL	Male	50	1	4	CD19	0
258	CAR-T	DLBCL	Female	59	1	0	CD19/22	0
259	CAR-T	DLBCL	Male	38	1	0	CD19/22	0
260	CAR-T	DLBCL	Female	52	2	0	CD19/22	0
261	CAR-T	DLBCL	Female	66	1	0	CD19/22	0
262	CAR-T	DLBCL	Female	59	1	0	CD19/22	0
263	CAR-T	DLBCL	Female	52	1	0	CD19/22	0
264	CAR-T	DLBCL	Female	54	1	0	CD19/22	0
265	CAR-T	DLBCL	Male	47	1	0	CD19/22	0
266	CAR-T	DLBCL	Male	47	0	0	CD19/22	0
267	CAR-T	DLBCL	Male	62	1	0	CD19/20/22	0
268	CAR-T	DLBCL	Male	62	0	0	CD19/22	0
269	CAR-T	DLBCL	Female	56	1	0	CD19/22	0
270	CAR-T	DLBCL	Male	61	2	0	CD19/22	0
271	CAR-T	DLBCL	Male	66	0	0	CD19	0
272	CAR-T	DLBCL	Female	34	1	0	CD19/22	0
273	CAR-T	DLBCL	Female	70	1	1	CD19/22	0
274	CAR-T	DLBCL	Male	38	1	0	CD19/22	0
275	CAR-T	DLBCL	Male	49	1	0	CD19/20/22	0
276	CAR-T	DLBCL	Female	61	2	0	CD19/20	0
277	CAR-T	DLBCL	Male	33	3	0	CD19/22	0
278	CAR-T	DLBCL	Female	31	1	0	CD19/22	0
279	CAR-T	DLBCL	Female	63	2	0	CD19/22	0
280	CAR-T	DLBCL	Female	42	1	0	CD19/22	0
281	CAR-T	DLBCL	Male	44	3	0	CD19/22	0
282	CAR-T	DLBCL	Male	58	2	1	CD19/22	0
283	CAR-T	DLBCL	Male	43	2	0	CD19/22	0
284	CAR-T	DLBCL	Female	38	0	0	CD19/22	0
285	CAR-T	DLBCL	Male	54	0	0	CD19	0
286	CAR-T	DLBCL	Male	67	1	0	CD19/22	0
287	CAR-T	MCL	Male	54	2	1	CD19/20	0
288	CAR-T	MCL	Male	38	3	0	CD19/22	0
289	CAR-T	MCL	Male	49	0	0	CD19/22	0
290	CAR-T	DLBCL	Female	28	1	0	CD19/20/22	1
291	CAR-T	DLBCL	Male	64	1	0	CD19/20	1
292	CAR-T	DLBCL	Female	51	2	3	CD19/22	1
